# Supplementary material for: Methanol Dehydration to Dimethyl Ether on Zr-Loaded P-Containing Mesoporous Activated Carbon Catalysts
Source: MDPI journal article supplement (doi:10.3390/ma12132204), 2019-07-09
Supplement: s1 [file s1]

Article

# Methanol Dehydration to Dimethyl Ether on Zr-Loaded P-Containing Mesoporous Activated Carbon Catalysts

José Palomo \*, José Rodríguez-Mirasol, and Tomás Cordero

Chemical Engineering Department, Andalucía Tech, Universidad de Málaga, 29010 Málaga, Spain

\* Correspondence: palomo@uma.es; Tel.: +34-951-952-529

Received: 16 June 2019; Accepted: 5 July 2019; Published: 9 July 2019

## Deconvolution of XPS spectra:

P2p:

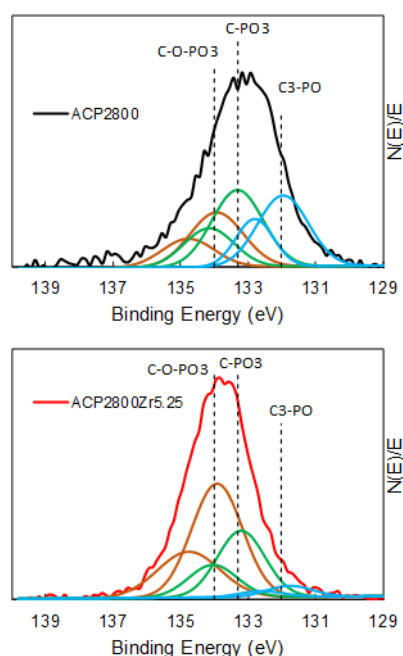

**Figure S1.** Deconvolution of the normalized P2p XPS spectra for ACP2800 and the 5.25 % Zr loaded phosphorus containing sample.

O1s: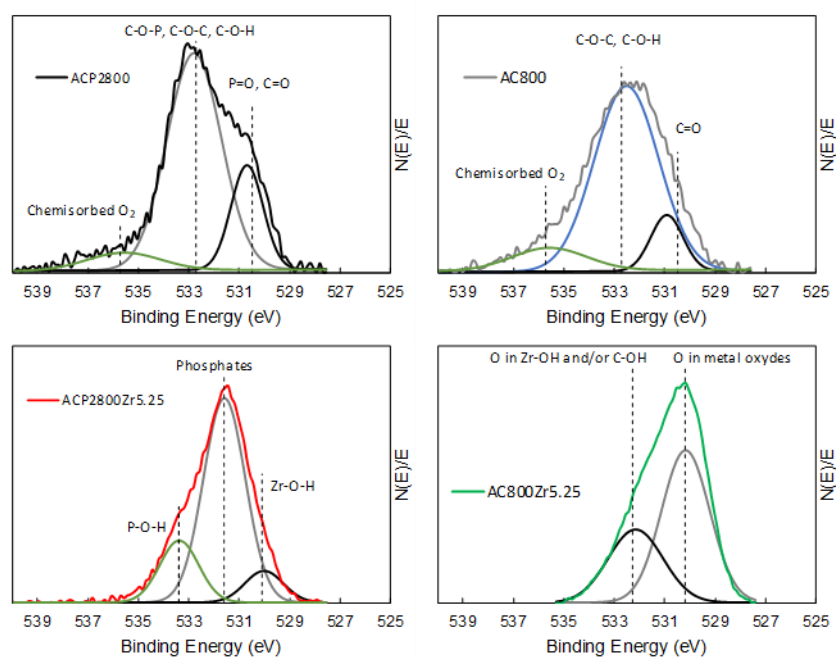

**Figure S2.** Deconvolution of the normalized O1s XPS spectra for ACP2800, AC800 and the 5.25 % Zr loaded samples (ACP2800Zr5.25 and AC800Zr5.25).

Zr3d: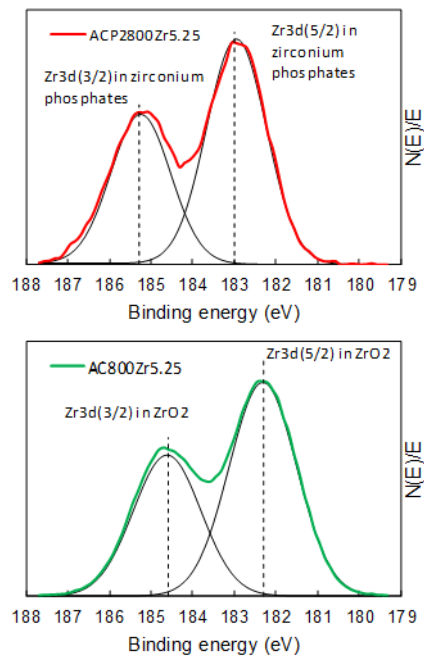

**Figure S3.** Deconvolution of the normalized Zr3d XPS spectra for the 5.25 % Zr loaded samples, ACP2800Zr5.25 and AC800Zr5.25.
